# Supplementary material for: Fabrication of highly stretchable salt and solvent blended PEDOT:PSS/PVA free-standing films: non-linear to linear electrical conduction response
Source: Royal Society of Chemistry journal article supplement (doi:10.1039/d3ra08260a), 2024-01-01
Supplement: d3ra08260a1.pdf [file d3ra08260a1.pdf]

## Electronic Supplementary Information (ESI)

### **Fabrication of highly stretchable salt and solvent blended PEDOT:PSS/PVA free-standing films: Non-linear to linear electrical conduction response**

Sanjib Sau and Sarathi Kundu\*

*Soft Nano Laboratory, Physical Sciences Division, Institute of Advanced Study in Science and Technology, Vigyan Path, Paschim Boragaon, Garchuk, Guwahati, Assam 781035, India*

*\*Corresponding author's Email: sarathi.kundu@gmail.com*

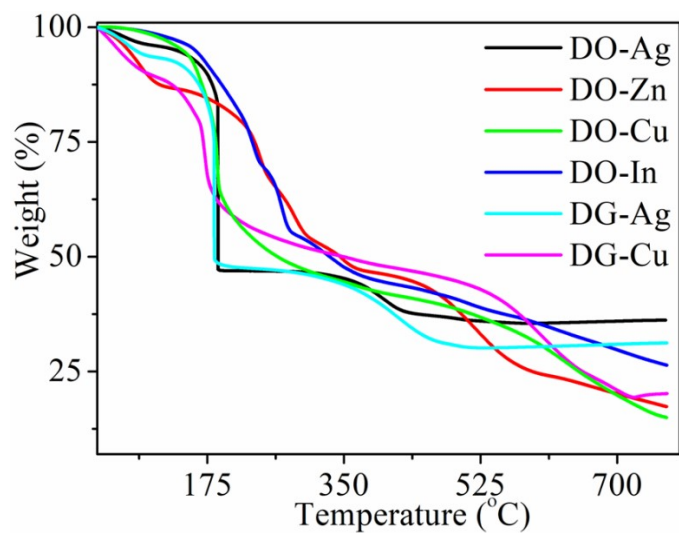

**Fig.S1.** TGA thermograms of some of the films.

**Table S1.** Salt agglomerated X-ray diffraction peak positions ( $\theta$ ) and the corresponding inter-planar spacings ( $d$ ) of DF-Zn, DO-Cu and DO-In films.

| DF-Zn                   |                      | DO-Cu                   |                      | DO-In                   |                      |
|-------------------------|----------------------|-------------------------|----------------------|-------------------------|----------------------|
| $\theta$ ( $^{\circ}$ ) | $d$ ( $\text{\AA}$ ) | $\theta$ ( $^{\circ}$ ) | $d$ ( $\text{\AA}$ ) | $\theta$ ( $^{\circ}$ ) | $d$ ( $\text{\AA}$ ) |
| 8.2                     | 10.77                | 10.8                    | 8.18                 | 12.8                    | 6.91                 |
| 11.2                    | 7.89                 | 15.5                    | 5.71                 | 13.3                    | 6.65                 |
| 28.1                    | 3.17                 | 19.1                    | 4.64                 | 15.1                    | 5.86                 |
| 30.3                    | 2.95                 | 22.0                    | 4.04                 | 16.4                    | 5.40                 |
| 31.1                    | 2.87                 | 27.1                    | 3.29                 | 20.1                    | 4.41                 |
| 32.8                    | 2.73                 | 31.4                    | 2.85                 | 22.2                    | 3.40                 |
| 33.5                    | 2.67                 | 33.3                    | 2.69                 | 22.9                    | 3.88                 |
| 34.5                    | 2.60                 | 36.9                    | 2.43                 | 23.8                    | 3.73                 |
| 58.2                    | 1.58                 | 40.3                    | 2.24                 | 25.3                    | 3.52                 |
| 61.1                    | 1.51                 | 41.2                    | 2.19                 | 26.4                    | 3.37                 |
|                         |                      | 42.0                    | 2.15                 | 29.2                    | 3.05                 |
|                         |                      | 45.7                    | 1.98                 | 30.5                    | 2.93                 |
|                         |                      | 46.5                    | 1.95                 | 34.5                    | 2.60                 |
|                         |                      | 49.3                    | 1.85                 | 40.0                    | 2.25                 |
|                         |                      | 52.0                    | 1.76                 | 58.8                    | 1.57                 |
|                         |                      | 57.9                    | 1.59                 | 73.1                    | 1.29                 |
|                         |                      | 67.3                    | 1.39                 |                         |                      |

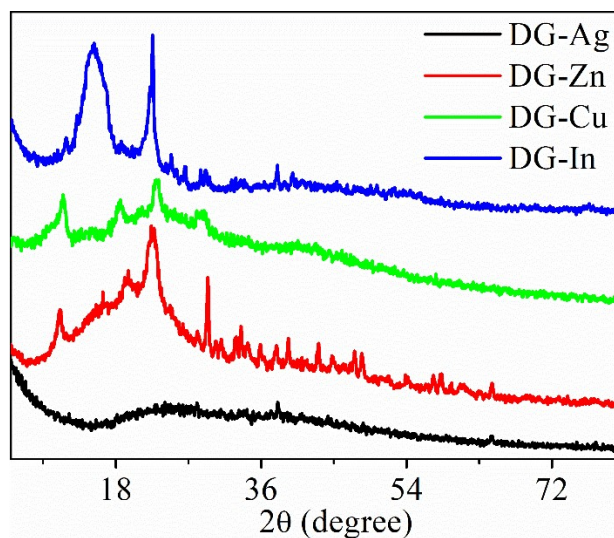

**Fig.S2.** XRD patterns for DG-Ag, DG-Zn, DG-Cu and DG-In films.

**Table S2.** FTIR peaks of pure PVA and PP-P films.

| Sample | Peak position (cm <sup>-1</sup> ) | Assigned as                                 |
|--------|-----------------------------------|---------------------------------------------|
| PVA    | 3259                              | – OH symmetric stretching vibration         |
|        | 2942, 2909                        | C – H stretching vibration of alkyl groups  |
|        | 1713                              | C = O stretching                            |
|        | 1645                              | Adsorbed water                              |
|        | 1086                              | – C – O stretching vibration                |
| PP-P   | 1525                              | C = C stretching vibration (thiophene ring) |
|        | 1203                              | C – O – C stretching vibration              |
|        | 1034, 1007                        | Stretching vibration of sulfonic acid group |
|        | 973, 667                          | C – S stretching vibration                  |

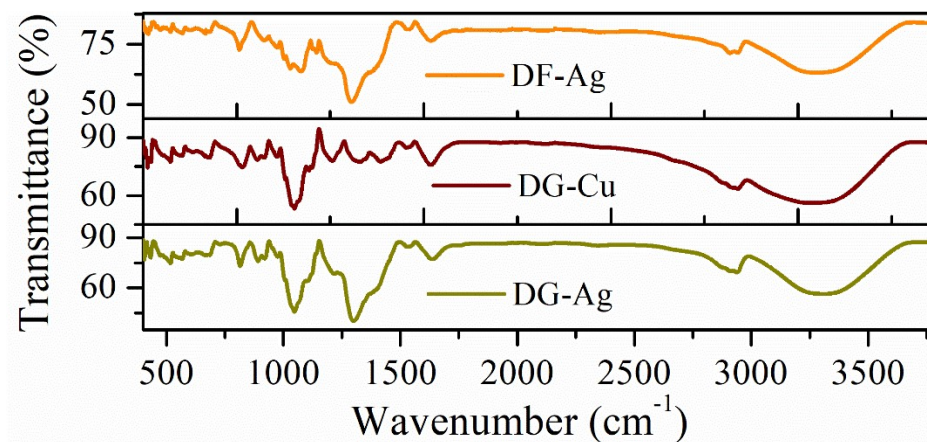

Fig.S3. FTIR spectra of DG-Ag, DG-Cu and DF-Ag films.

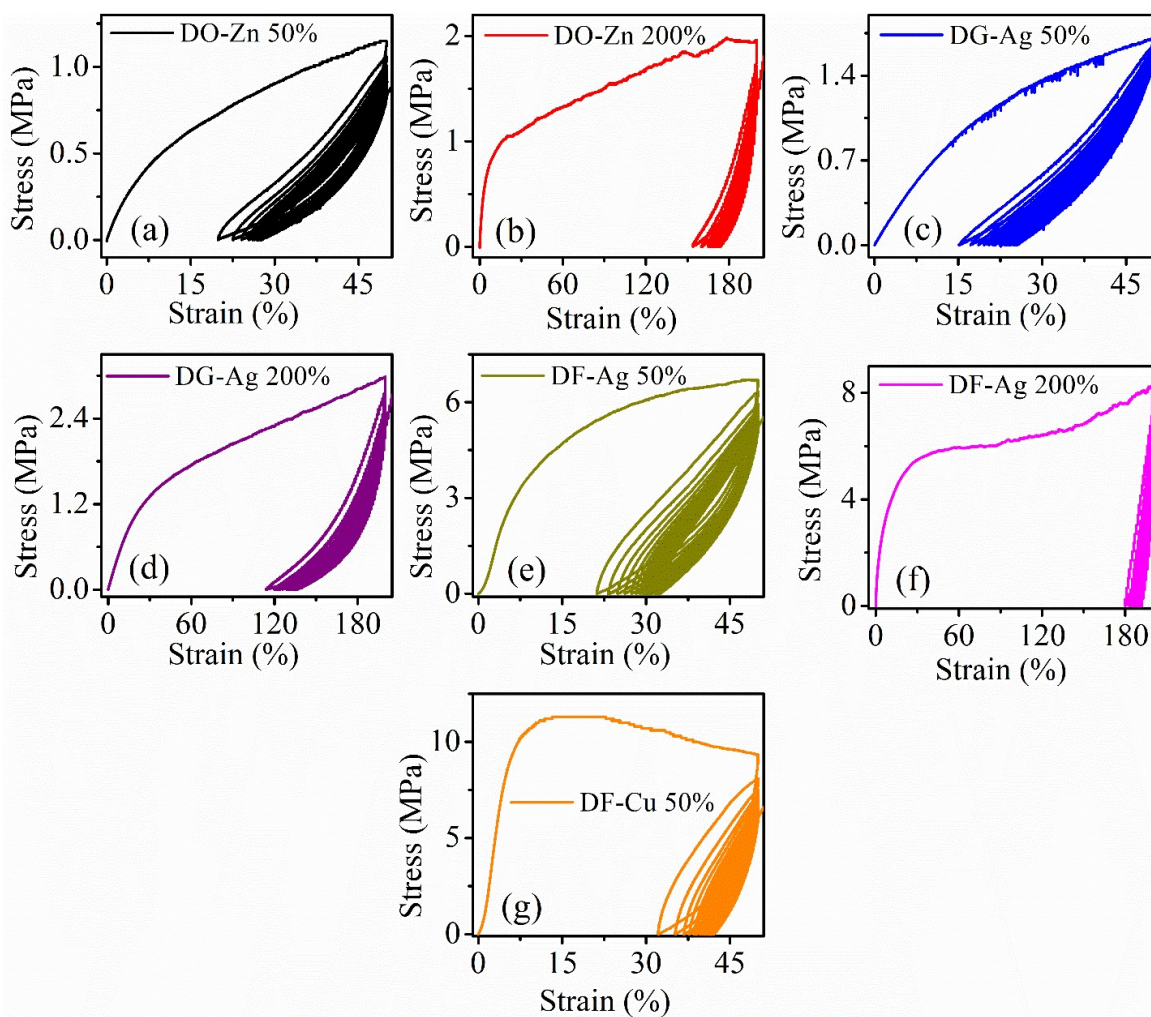

Fig.S4. Loading-unloading plots for twenty consecutive cycles at 50 and 200% strains for DO-Zn, DG-Ag and DF-Ag films and, at 50% strain for DF-Cu film.

**Table S3.** The estimated hysteresis energies in  $\text{KJ/m}^3$  from first to twentieth consecutive cycle at 50 and 200% strains for some of the films.

| Cycle number | DO-Zn 50% | DO-Zn 200% | DG-Ag 50% | DG-Ag 200% | DF-Ag 50% | DF-Ag 200% | DF-Cu 50% |
|--------------|-----------|------------|-----------|------------|-----------|------------|-----------|
| 1            | 285.5     | 2815.0     | 354.6     | 3527.4     | 1986.8    | 11936.8    | 4483.5    |
| 2            | 66.8      | 146.1      | 72.4      | 385.8      | 511.2     | 375.7      | 572.2     |
| 3            | 51.0      | 101.7      | 54.5      | 250.8      | 410.0     | 244.3      | 371.0     |
| 4            | 44.8      | 86.1       | 48.1      | 234.4      | 355.1     | 210.2      | 294.0     |
| 5            | 40.7      | 78.4       | 41.5      | 195.2      | 319.9     | 164.4      | 254.8     |
| 6            | 38.0      | 55.3       | 38.0      | 186.4      | 293.4     | 137.8      | 216.4     |
| 7            | 36.6      | 61.1       | 34.9      | 156.5      | 275.4     | 122.4      | 203.9     |
| 8            | 34.1      | 62.3       | 36.1      | 127.3      | 261.0     | 111.3      | 184.8     |
| 9            | 32.5      | 62.5       | 30.2      | 150.3      | 245.4     | 97.8       | 172.2     |
| 10           | 32.4      | 60.9       | 32.0      | 147.6      | 237.6     | 92.4       | 161.5     |
| 11           | 31.5      | 57.0       | 29.6      | 134.6      | 231.1     | 85.2       | 156.0     |
| 12           | 30.3      | 54.5       | 28.7      | 124.2      | 225.5     | 80.0       | 146.2     |
| 13           | 31.0      | 49.5       | 28.1      | 114.7      | 221.8     | 79.5       | 137.1     |
| 14           | 30.1      | 47.0       | 27.7      | 97.4       | 216.9     | 73.9       | 132.0     |
| 15           | 27.6      | 52.7       | 26.8      | 130.5      | 212.4     | 72.4       | 131.5     |
| 16           | 26.5      | 43.7       | 25.4      | 118.0      | 214.8     | 66.8       | 125.7     |
| 17           | 26.2      | 43.5       | 26.4      | 117.8      | 202.9     | 65.9       | 122.3     |
| 18           | 26.9      | 45.5       | 24.5      | 115.1      | 202.2     | 63.9       | 117.4     |
| 19           | 26.9      | 45.9       | 23.5      | 109.5      | 200.5     | 63.1       | 112.1     |
| 20           | 26.7      | 46.0       | 23.1      | 111.3      | 192.9     | 61.2       | 114.2     |

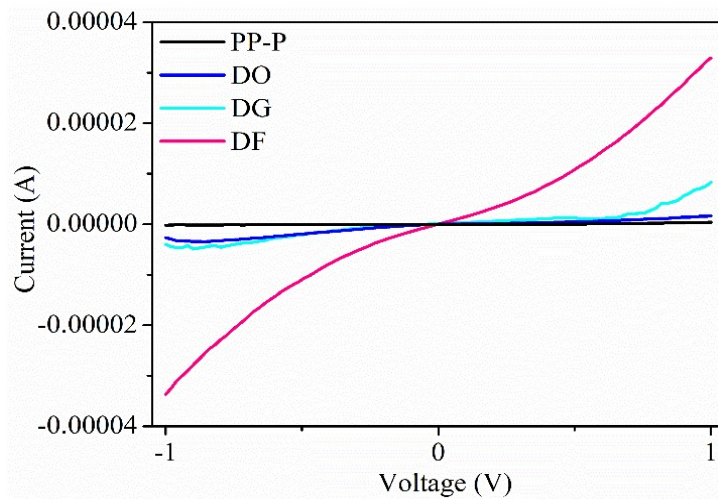

**Fig.S5.** Non-linear I-V characteristics of PP-P, DO, DG and DF films.
